# Supplementary material
Source: publisher figshare collection journal article supplement (https://gsapubs.figshare.com/ndownloader/files/34471229)
Supplement: Supplementary file 1 [file 34471229]

## Sheet: Standards
Supplement 5. U-Pb isotope data for zircon reference materials analyzed by LA-ICP-MS
Reference	Run	238U/ 206Pb	238/206 2SE	207Pb/ 206Pb	207/206 2SE	Error Correlation	238U/206Pb Age (Ma)	Uncertainty (Ma)		91500 Analysis	Run	238U/ 206Pb	238/206 2SE	207Pb/ 206Pb	207/206 2SE	Error Correlation	238U/206Pb Age (Ma)	Uncertainty (Ma)		R33 Analysis Name	Run	Final 238_206	New Final238_206 Int2SE	Final 207_206	New Final207_206_Int2SE	ErrorCorrelation_38_6vs7_6	FinalAge206_238 (copy)	New Uncertainty		SL Analysis Name	Run	Final 238_206	New Final238_206 Int2SE	Final 207_206	New Final207_206_Int2SE	ErrorCorrelation_38_6vs7_6	FinalAge206_238 (copy)	New Uncertainty
Plesovice_1	CH-031	18.6047	0.173775	0.0538	0.00759809	0.13836	337.5	3.15239		91500_1	CH-031	5.5788	0.0488947	0.0729	0.01044	-0.08593	1062.8	9.31478
Plesovice_2	CH-031	18.4298	0.158866	0.04651	0.00656409	-0.051098	340.62	2.93616		91500_2	CH-031	5.57911	0.049139	0.0821	0.01167	0.083897	1062.8	9.36079
Plesovice_3	CH-031	18.5977	0.163	0.0548	0.00776528	0.078399	337.8	2.96065		91500_3	CH-031	5.59597	0.05008	0.0666	0.00952	-0.089393	1059.8	9.48447
Plesovice_4	CH-031	18.5839	0.161574	0.04758	0.00670907	0.059308	337.9	2.93781		91500_4	CH-031	5.55926	0.0494344	0.0771	0.011	0.10587	1066.3	9.48182
Plesovice_5	CH-031	18.5874	0.171881	0.0544	0.00774361	0.16144	337.8	3.1237		91500_5	CH-031	5.59409	0.0520738	0.0775	0.01109	0.0021309	1060.6	9.87281
Plesovice_6	CH-031	18.4264	0.158833	0.0705	0.00994268	-0.070366	340.7	2.93679		91500_6	CH-031	5.60287	0.0498889	0.0803	0.01146	0.06689	1058.6	9.42596
Plesovice_7	CH-031	18.6393	0.160887	0.05877	0.00828132	0.10836	336.9	2.90798		91500_7	CH-031	5.55957	0.0491858	0.0719	0.01028	0.075443	1066.2	9.43272
Plesovice_8	CH-031	18.6602	0.158814	0.05353	0.00755168	0.1747	336.55	2.86433		91500_8	CH-031	5.58566	0.0490837	0.0737	0.01049	0.045172	1061.6	9.32876
Plesovice_9	CH-031	18.577	0.159129	0.0537	0.00759805	-0.027619	337.96	2.89494
Plesovice_1	CH-036	18.5082	0.1091	0.05566	0.00019	0.052204	339.2	0.9		91500_2	CH-036	5.50509	0.0349221	0.07525	0.00039	0.016632	1075.9	3.6
Plesovice_2	CH-036	18.5219	0.136027	0.05566	0.00019	0.11669	338.9	1.7		91500_3	CH-036	5.62525	0.0347015	0.07442	0.00041	0.057176	1055	3.3
Plesovice_3	CH-036	18.6289	0.108371	0.05303	0.00017	0.027598	337.09	0.85		91500_4	CH-036	5.62335	0.0353828	0.07493	0.00034	0.060228	1055.4	3.4
Plesovice_4	CH-036	18.7021	0.119797	0.05368	0.00017	0.083656	335.8	1.2		91500_5	CH-036	5.64748	0.0366977	0.07489	0.00036	0.11424	1050.9	3.8
Plesovice_5	CH-036	18.6047	0.103967	0.05414	0.00015	0.023334	337.51	0.68		91500_6	CH-036	5.65355	0.0363713	0.07486	0.00043	0.097195	1049.8	3.7
Plesovice_6	CH-036	18.5943	0.106627	0.05415	0.00018	0.1237	337.7	0.82		91500_7	CH-036	5.66059	0.0356921	0.07474	0.00041	0.022553	1049	3.4
Plesovice_7	CH-036	18.546	0.106301	0.05405	0.00017	0.050216	338.53	0.77		91500_8	CH-036	5.57911	0.0362822	0.07505	0.00039	0.039166	1063.1	3.8
Plesovice_8	CH-036	18.622	0.106814	0.05377	0.00017	0.03441	337.22	0.82		91500_9	CH-036	5.56607	0.0365418	0.07492	0.00038	0.01413	1065.1	3.9
Plesovice_9	CH-036	18.6567	0.113637	0.05401	0.00016	0.0085132	336.6	1
Plesovice_1	CH-039	18.7196	0.211679	0.05367	0.000872	-0.16803	335.47	3.79		91500_1	CH-039	5.5841	0.064683	0.0738	0.002034	-0.079687	1061.9	12.3
Plesovice_2	CH-039	18.5874	0.211802	0.05465	0.000979	0.17849	337.82	3.85		91500_2	CH-039	5.576	0.063675	0.0763	0.002036	-0.094965	1063.3	12.14
Plesovice_3	CH-039	18.7371	0.275335	0.0536	0.002018	0.078906	335.2	4.93		91500_3	CH-039	5.5841	0.064121	0.0745	0.001838	0.019053	1061.9	12.19
Plesovice_4	CH-039	18.4638	0.21535	0.0524	0.001228	0.1402	340	3.97		91500_4	CH-039	5.58005	0.063895	0.0761	0.00184	0.01761	1062.6	12.17
Plesovice_5	CH-039	18.6428	0.211594	0.05342	0.000843	-0.014386	336.8	3.82		91500_5	CH-039	5.5894	0.063924	0.0733	0.001935	-0.072785	1061	12.13
Plesovice_6	CH-039	18.5185	0.222363	0.0538	0.001328	0.035513	339	4.07		91500_6	CH-039	5.56607	0.063723	0.0753	0.001937	-0.03006	1065.1	12.19
Plesovice_7	CH-039	18.4196	0.217123	0.0535	0.001229	0.15307	340.8	4.02		91500_7	CH-039	5.58971	0.064657	0.0748	0.002035	0.14018	1060.9	12.27
Plesovice_0	CH-041	18.8	0.28	0.05316	0.0009	0.15598	333.9	4.92		91500_0	CH-041	5.5	0.08	0.07484	0.0014	0.066605	1068	16.27		r33	CH-041	14.2	0.21	0.05508	0.00098	0.11238	438.7	6.46		SL	CH-041	11.1	0.15	0.0594	0.00098	-0.030398	557.8	7.8
Plesovice_1	CH-041	18.9	0.29	0.05339	0.00093	-0.058611	332.6	5.08		91500_1	CH-041	5.6	0.08	0.07442	0.00137	0.24411	1064.6	15.45		r33_1	CH-041	15	0.21	0.05542	0.00092	0.049101	416.7	5.84		SL_1	CH-041	11.1	0.16	0.05928	0.00098	0.16368	557.5	8.19
Plesovice_2	CH-041	18.8	0.27	0.05349	0.00093	0.1221	334.2	4.79		91500_2	CH-041	5.7	0.08	0.07558	0.00139	0.2448	1050	15.73		r33_2	CH-041	15.1	0.21	0.05491	0.00095	0.012097	413.8	5.78		SL_2	CH-041	11.2	0.16	0.0599	0.00101	0.079789	551	7.9
Plesovice_3	CH-041	18.6	0.27	0.05374	0.00091	0.077724	337.2	4.94		91500_3	CH-041	5.6	0.08	0.07485	0.00139	0.24629	1064.5	15.07		r33_3	CH-041	14.7	0.22	0.05604	0.00113	0.01969	423	6.17		SL_3	CH-041	11.1	0.17	0.05973	0.00099	-0.017982	556.6	8.56
Plesovice_4	CH-041	18.7	0.27	0.0586	0.0029	-0.34275	335	4.88		91500_4	CH-041	5.6	0.08	0.0746	0.00136	0.06675	1056.7	15.39
Plesovice_5	CH-041	18.7	0.3	0.05369	0.00094	0.25191	336.2	5.46		91500_5	CH-041	5.6	0.08	0.07514	0.00137	0.13564	1067.3	14.73
Plesovice_6	CH-041	19	0.27	0.05448	0.00102	-0.10843	330.4	4.76		91500_6	CH-041	5.6	0.08	0.07506	0.00137	0.22561	1065	14.71
Plesovice_7	CH-041	18.7	0.27	0.05384	0.00092	-0.0024579	336.6	4.85		91500_7	CH-041	5.6	0.08	0.07417	0.00136	-0.092322	1058.6	15.4
Plesovice_8	CH-041	18.5	0.29	0.05356	0.00095	0.13317	339.6	5.3		91500_8	CH-041	5.6	0.08	0.07545	0.0014	0.20217	1064.2	15.07
Plesovice_9	CH-041	18.6	0.28	0.05367	0.00092	0.23662	336.9	5.07		91500_9	CH-041	5.6	0.08	0.07488	0.00137	0.29575	1061.4	14.68
Plesovice_10	CH-041	18.7	0.29	0.05462	0.00098	-0.032339	336.2	5.19		91500_10	CH-041	5.6	0.09	0.07492	0.00133	0.002245	1062	16.23
Plesovice_1	CH-053	18.77	0.13	0.05766	0.000629321	0.49431	334.7	2.34		91500_1	CH-053	5.62	0.04	0.07553	0.000796426	0.080465	1055.8	7.77
Plesovice_2	CH-053	18.56	0.12	0.0556	0.000519697	0.19029	338.2	2.14		91500_2	CH-053	5.55	0.04	0.07538	0.000843197	-0.50483	1068.8	7.48
Plesovice_3	CH-053	18.68	0.12	0.05428	0.000525268	-0.050316	336.2	2.14		91500_3	CH-053	5.59	0.04	0.07402	0.000821464	-0.32581	1060.9	7.45
Plesovice_4	CH-053	18.38	0.11	0.05511	0.000519499	0.17853	341.6	2.13		91500_4	CH-053	5.58	0.04	0.07452	0.000772479	0.084038	1062.9	7.1
Plesovice_5	CH-053	18.62	0.12	0.05187	0.00050204	0.095055	337.3	2.11		91500_5	CH-053	5.58	0.04	0.07132	0.000766486	0.13321	1062.2	7.13
Plesovice_6	CH-053	18.79	0.12	0.05671	0.000544354	0.020256	334.3	2.07		91500_6	CH-053	5.58	0.04	0.07969	0.000832027	0.015467	1062.1	7.03
Plesovice_7	CH-053	18.55	0.12	0.05451	0.000531508	0.0027529	338.6	2.12		91500_7	CH-053	5.59	0.04	0.07473	0.000820181	0.12217	1061.5	6.96
Plesovice_8	CH-053	18.74	0.12	0.05397	0.00052732	0.13243	335.1	2.13		91500_8	CH-053	5.55	0.04	0.07365	0.000782986	0.22208	1068	7.3
Plesovice_9	CH-053	18.86	0.12	0.05311	0.000520669	0.097837	333.1	2.09		91500_9	CH-053	5.6	0.04	0.07548	0.000796067	0.04909	1059.2	7.02
Plesovice_1	CH-072	18.349	0.285	0.056	0.001	0.06378	342.1	5.31		91500_1	CH-072	5.576	0.086	0.075	0.002	0.011534	1063.4	16.37
Plesovice_2	CH-072	18.282	0.281	0.053	0.001	0.07897	343.3	5.27		91500_2	CH-072	5.588	0.086	0.074	0.002	0.12285	1061.2	16.3
Plesovice_3	CH-072	18.474	0.282	0.054	0.001	-0.0051426	339.8	5.2		91500_3	CH-072	5.577	0.086	0.075	0.002	0.11359	1063.1	16.38
Plesovice_4	CH-072	18.474	0.282	0.054	0.001	0.060924	339.8	5.2		91500_4	CH-072	5.584	0.086	0.075	0.002	0.077541	1061.9	16.35
Plesovice_5	CH-072	18.639	0.285	0.054	0.001	0.048497	336.88	5.15		91500_5	CH-072	5.581	0.086	0.075	0.002	0.095895	1062.4	16.35
Plesovice_6	CH-072	18.632	0.284	0.054	0.001	0.12445	337.02	5.14		91500_6	CH-072	5.574	0.086	0.075	0.002	0.13776	1063.8	16.46
Plesovice_7	CH-072	18.629	0.284	0.054	0.001	-0.053373	337.09	5.13		91500_7	CH-072	5.594	0.087	0.075	0.002	0.1746	1060.4	16.42
Plesovice_8	CH-072	18.709	0.287	0.054	0.001	0.20274	335.7	5.15		91500_8	CH-072	5.574	0.085	0.075	0.002	0.11649	1063.7	16.31
Plesovice_9	CH-072	18.664	0.284	0.054	0.001	-0.048633	336.47	5.12		91500_9	CH-072	5.586	0.086	0.075	0.002	0.11114	1061.6	16.4
Plesovice_1	CH-73	18.7336	0.25	0.05431	0.00111	0.27924	335.3	4.54		91500_1	CH-73	5.58129	0.08	0.07488	0.00155	-0.0025561	1062.4	14.58
Plesovice_2	CH-73	18.6254	0.25	0.05448	0.00111	0.13175	337.1	4.56		91500_2	CH-73	5.58129	0.08	0.07488	0.00157	0.073301	1062.4	14.37
Plesovice_3	CH-73	18.6532	0.26	0.0538	0.00114	0.072712	336.7	4.74		91500_3	CH-73	5.58129	0.08	0.07488	0.00158	0.035004	1062.4	14.44
Plesovice_4	CH-73	19.0404	0.26	0.0548	0.00112	0.16679	330.1	4.51		91500_4	CH-73	5.58316	0.08	0.07488	0.00157	0.040681	1062.4	14.44
Plesovice_5	CH-73	18.7126	0.28	0.05496	0.00114	0.034607	335.6	5		91500_5	CH-73	5.58129	0.08	0.07488	0.00158	0.061285	1062.4	14.42
Plesovice_6	CH-73	18.8395	0.27	0.05562	0.00116	-0.056816	333.4	4.83		91500_6	CH-73	5.58129	0.08	0.07488	0.00156	0.084104	1062.4	14.4
Plesovice_7	CH-73	18.7371	0.26	0.05435	0.00113	0.08199	335.2	4.63		91500_7	CH-73	5.58129	0.08	0.07491	0.00156	0.089205	1062.4	14.47
Plesovice_8	CH-73	18.8893	0.26	0.05426	0.00112	-0.027315	332.6	4.6		91500_8	CH-73	5.58129	0.08	0.07488	0.00157	0.21466	1062.4	14.37
Plesovice_9	CH-73	18.6289	0.26	0.05354	0.00111	-0.19469	337.1	4.68
Plesovice_1	CH-074	18.5805	0.17	0.05537	0.00124	0.08691	337.9	3.16		91500_1	CH-074	5.57724	0.05	0.07517	0.00172	0.20534	1063.1	10.14
Plesovice_2	CH-074	18.5874	0.17	0.0546	0.00122	0.07481	337.8	3.01		91500_2	CH-074	5.58441	0.05	0.07493	0.00171	0.045182	1061.8	9.97
Plesovice_3	CH-074	18.5563	0.18	0.0535	0.00121	0.074694	338.4	3.28		91500_3	CH-074	5.59159	0.05	0.07439	0.00169	0.044081	1060.6	9.98
Plesovice_4	CH-074	18.4706	0.17	0.05486	0.00123	0.11927	339.9	3.07		91500_4	CH-074	5.54785	0.05	0.0756	0.00175	0.053738	1068.3	10.09
Plesovice_5	CH-074	18.474	0.18	0.05377	0.00121	0.041902	339.8	3.35		91500_5	CH-074	5.60444	0.05	0.07462	0.0017	0.048484	1058.3	9.89
Plesovice_6	CH-074	18.4809	0.16	0.0537	0.00121	0.022289	339.72	3.01		91500_6	CH-074	5.58909	0.05	0.07456	0.00172	0.21307	1061	9.96
Plesovice_7	CH-074	18.6428	0.17	0.05437	0.00121	0.05602	336.9	3.02		91500_7	CH-074	5.57103	0.05	0.07497	0.00172	0.024237	1064.2	9.96
Plesovice_8	CH-074	18.7441	0.17	0.05507	0.00123	-0.0098055	335.1	3.01		91500_8	CH-074	5.56607	0.05	0.07472	0.0017	0.15783	1065	9.76
Plesovice_9	CH-074	18.5563	0.16	0.05474	0.00122	0.091003	338.37	2.99		91500_9	CH-074	5.60255	0.05	0.07519	0.00171	0.014313	1059	10.03
Plesovice_1	CH-108, CH-115, CH-127	18.9072	0.16	0.05451	0.00051	0.059145	332.24	2.74		91500_1	CH-108,CH-115, CH-127	5.68182	0.06	0.07534	0.00084	0.089105	1045.09	10.17		R33_1	CH-108,CH-115, CH-127	15.0534	0.12	0.05512	0.00062	0.060204	414.61	3.32		SL1_1	CH-108,CH-115, CH-127	11.0011	0.24	0.06125	0.00058	-0.05212	560.86	12.14
Plesovice_2	CH-108,CH-115, CH-127	18.6846	0.17	0.05449	0.00052	-0.018586	336.1	2.99		91500_2	CH-108,CH-115, CH-127	5.67215	0.07	0.07562	0.00089	0.032152	1046.73	12.19		R33_2	CH-108,CH-115, CH-127	14.7254	0.17	0.05622	0.00094	-0.91193	423.55	4.91		SL1_2	CH-108,CH-115, CH-127	11.1235	0.24	0.06078	0.00057	-0.25711	554.95	12.13
Plesovice_3	CH-108,CH-115, CH-127	18.5185	0.16	0.05423	0.00052	0.16736	339.03	2.86		91500_3	CH-108,CH-115, CH-127	5.50964	0.05	0.07479	0.00084	0.1247	1075.16	9.32		R33_3	CH-108,CH-115, CH-127	14.8942	0.12	0.05563	0.00065	0.12654	418.9	3.34		SL1_3	CH-108,CH-115, CH-127	11.3895	0.27	0.06148	0.00059	-0.14263	542.51	12.73
Plesovice_4	CH-108,CH-115, CH-127	18.6986	0.17	0.05428	0.00054	-0.16067	335.85	3.04		91500_4	CH-108,CH-115, CH-127	5.58971	0.06	0.07506	0.00084	-0.0053583	1060.96	10.7		R33_4	CH-108,CH-115, CH-127	15.0943	0.12	0.05503	0.00064	0.03791	413.52	3.36		SL1_4	CH-108,CH-115, CH-127	11.2867	0.27	0.06089	0.00059	-0.19388	547.25	13.33
Plesovice_5	CH-108,CH-115, CH-127	18.5185	0.16	0.05403	0.00054	-0.10373	339.03	2.95		91500_5	CH-108,CH-115, CH-127	5.59597	0.05	0.07476	0.00084	0.030272	1059.87	9.27		R33_5	CH-108,CH-115, CH-127	15.058	0.12	0.05536	0.00065	0.026304	414.49	3.27		SL1_5	CH-108,CH-115, CH-127	11.2233	0.25	0.06061	0.00059	-0.035783	550.21	12.13
Plesovice_6	CH-108,CH-115, CH-127	18.3453	0.17	0.05426	0.00055	-0.027335	342.15	3.26		91500_6	CH-108,CH-115, CH-127	5.52792	0.05	0.07436	0.00082	0.099267	1071.89	9.31		R33_6	CH-108,CH-115, CH-127	15.1791	0.12	0.05593	0.00061	-0.32954	411.29	3.22		SL1_6	CH-108,CH-115, CH-127	11.0865	0.24	0.06052	0.00059	-0.076346	556.72	12.13
Plesovice_7	CH-108,CH-115, CH-127	18.7371	0.17	0.05504	0.00055	0.11475	335.18	3.04		91500_7	CH-108,CH-115, CH-127	5.57414	0.05	0.07514	0.00088	-0.033818	1063.7	9.74		R33_7	CH-108,CH-115, CH-127	15.0285	0.11	0.0557	0.00056	-0.12195	415.28	3.03		SL1_7	CH-108,CH-115, CH-127	11.0619	0.24	0.06047	0.0006	-0.15923	557.9	12.13
Plesovice_8	CH-108,CH-115, CH-127	18.7301	0.17	0.05472	0.00053	0.033434	335.3	3.04		91500_8	CH-108,CH-115, CH-127	5.55864	0.06	0.07473	0.00086	-0.054686	1066.43	10.71												SL1_8	CH-108,CH-115, CH-127	11.1982	0.25	0.06014	0.00058	-0.0034986	551.4	12.13
Plesovice_9	CH-108,CH-115, CH-127	18.5736	0.16	0.05447	0.00053	0.016412	338.05	3		91500_9	CH-108,CH-115, CH-127	5.55864	0.05	0.07546	0.00096	-0.16519	1066.43	9.75												SL1_9	CH-108,CH-115, CH-127	11.1483	0.26	0.06046	0.00059	-0.18067	553.76	12.73
Plesovice_10	CH-108,CH-115, CH-127	18.7688	0.17	0.05449	0.00053	-0.036063	334.63	3.08		91500_10	CH-108,CH-115, CH-127	5.51876	0.05	0.07443	0.00093	0.088643	1073.53	10.24												SL1_10	CH-108,CH-115, CH-127	11.1982	0.27	0.06054	0.00058	-0.084761	551.4	13.33
Plesovice_11	CH-108,CH-115, CH-127	18.44	0.16	0.05413	0.00054	0.10052	340.44	3		91500_11	CH-108,CH-115, CH-127	5.56793	0.06	0.07467	0.00088	0.043063	1064.79	10.71												SL1_11	CH-108,CH-115, CH-127	11.236	0.27	0.06046	0.00058	-0.056614	549.62	13.33
Plesovice_12	CH-108,CH-115, CH-127	18.6324	0.18	0.05405	0.00056	0.19908	337.01	3.19		91500_12	CH-108,CH-115, CH-127	5.65611	0.06	0.07439	0.00084	0.096969	1049.47	10.67												SL1_12	CH-108,CH-115, CH-127	11.0375	0.25	0.06071	0.00061	-0.037018	559.08	12.73
Plesovice_13	CH-108,CH-115, CH-127	18.546	0.21	0.05408	0.00057	0.063941	338.54	3.83		91500_13	CH-108,CH-115, CH-127	5.63063	0.05	0.07493	0.00088	0.019928	1053.85	9.25
Plesovice_14	CH-108,CH-115, CH-127	18.0018	0.17	0.1043	0.00135	-0.1504	348.51	3.23		91500_14	CH-108,CH-115, CH-127	5.60224	0.06	0.07487	0.00086	0.06221	1058.77	10.69
Plesovice_15	CH-108,CH-115, CH-127	18.6532	0.17	0.05384	0.00056	-0.02563	336.65	3.09		91500_15	CH-108,CH-115, CH-127	5.55864	0.1	0.07463	0.00092	0.016899	1066.43	19.89
Plesovice_16	CH-108,CH-115, CH-127	18.6324	0.16	0.054	0.00054	0.049801	337.01	2.9		91500_16	CH-108,CH-115, CH-127	5.60853	0.08	0.07425	0.00083	0.0124	1057.68	14.33
Plesovice_17	CH-108,CH-115, CH-127	18.7126	0.17	0.05417	0.00054	0.12139	335.61	3.04		91500_17	CH-108,CH-115, CH-127	5.56793	0.06	0.07453	0.00082	-0.0017973	1064.79	12.22
Plesovice_18	CH-108,CH-115, CH-127	18.577	0.16	0.05384	0.00056	0.03155	337.99	2.95		91500_18	CH-108,CH-115, CH-127	5.54939	0.07	0.0752	0.00089	-0.23982	1068.07	13.28
Plesovice_19	CH-108,CH-115, CH-127	18.6393	0.16	0.05379	0.00054	0.062235	336.89	2.94		91500_19	CH-108,CH-115, CH-127	5.6338	0.07	0.07543	0.00083	-0.19025	1053.3	13.79
Plesovice_20	CH-108,CH-115, CH-127	18.7196	0.16	0.05389	0.00056	0.10826	335.48	2.8		91500_20	CH-108,CH-115, CH-127	5.51876	0.05	0.07435	0.00085	0.066336	1073.53	10.24
Plesovice_21	CH-108,CH-115, CH-127	18.6463	0.17	0.05413	0.00053	0.045166	336.77	2.99		91500_21	CH-108,CH-115, CH-127	5.57103	0.05	0.07565	0.00085	0.19998	1064.24	10.22
Plesovice_22	CH-108,CH-115, CH-127	18.6776	0.18	0.05455	0.00054	0.014113	336.22	3.19		91500_22	CH-108,CH-115, CH-127	5.54017	0.07	0.07456	0.00084	0.055732	1069.71	12.75
Plesovice_23	CH-108,CH-115, CH-127	18.5288	0.17	0.05381	0.00057	-0.12715	338.85	3.2		91500_23	CH-108,CH-115, CH-127	5.59597	0.06	0.07477	0.00089	-0.035521	1059.87	10.69
Plesovice_24	CH-108,CH-115, CH-127	18.6012	0.16	0.05422	0.00058	0.015351	337.56	2.9		91500_24	CH-108,CH-115, CH-127	5.61482	0.05	0.07444	0.00088	0.071012	1056.59	9.72
Plesovice_25	CH-108,CH-115, CH-127	18.5323	0.17	0.05387	0.00055	0.075111	338.79	3.15		91500_25	CH-108,CH-115, CH-127	5.56483	0.05	0.07513	0.00091	0.083696	1065.34	10.22
Plesovice_26	CH-108,CH-115, CH-127	18.6776	0.17	0.0675	0.00247	-0.11765	336.22	3.14		91500_26	CH-108,CH-115, CH-127	5.53097	0.06	0.07488	0.00091	0.13345	1071.34	12.24
Plesovice_27	CH-108,CH-115, CH-127	18.6498	0.16	0.05459	0.00056	0.072708	336.71	2.94		91500_27	CH-108,CH-115, CH-127	5.60224	0.07	0.07539	0.00084	-0.080109	1058.77	13.8
Plesovice_28	CH-108,CH-115, CH-127	18.7758	0.18	0.0541	0.00056	-0.0098783	334.51	3.13		91500_28	CH-108,CH-115, CH-127	5.58347	0.09	0.0752	0.00089	0.081535	1062.06	17.08
Plesovice_29	CH-108,CH-115, CH-127	18.4298	0.18	0.0831	0.00525	-0.29662	340.62	3.36		91500_29	CH-108,CH-115, CH-127	5.5991	0.09	0.07488	0.00091	-0.058744	1059.32	16.52
Plesovice_30	CH-108,CH-115, CH-127	18.7161	0.17	0.05414	0.00056	-0.014703	335.55	3.04		91500_30	CH-108,CH-115, CH-127	5.58971	0.06	0.07489	0.00087	0.097497	1060.96	11.2
Plesovice_31	CH-108,CH-115, CH-127	18.7056	0.18	0.05372	0.00054	-0.044251	335.73	3.29		91500_31	CH-108,CH-115, CH-127	5.64016	0.07	0.07514	0.00091	0.14267	1052.21	13.25
Plesovice_32	CH-108,CH-115, CH-127	18.6776	0.17	0.054	0.00052	0.017024	336.22	3.09		91500_32	CH-108,CH-115, CH-127	5.64016	0.08	0.0743	0.0009	-0.036523	1052.21	15.41
Plesovice_33	CH-108,CH-115, CH-127	18.615	0.18	0.05445	0.00055	-0.18224	337.32	3.3		91500_33	CH-108,CH-115, CH-127	5.54017	0.09	0.07509	0.00085	-0.0066063	1069.71	17.64
Plesovice-1	CH-160	18.882	0.16	0.05372	0.0006	0.14301	332.7	2.81		91500-1	CH-160	5.612	0.06	0.07463	0.00108	-0.021447	1056.9	11.38		R33-1	CH-160	15.076	0.16	0.05583	0.00065	0.15629	414	4.44		SL-1a	CH-160	11.203	0.11	0.05983	0.00068	0.036267	551.1	5.39
Plesovice-2	CH-160	18.864	0.17	0.05349	0.00061	0.065751	333	2.96		91500-2	CH-160	5.562	0.06	0.0751	0.00103	0.10522	1065.8	10.88		R33-2	CH-160	15.33	0.14	0.05514	0.00064	0.13532	407.3	3.83		SL1-1	CH-160	11.166	0.13	0.06013	0.00068	-0.032377	552.9	6.37
Plesovice-a	CH-160	19.264	0.18	0.05377	0.00061	0.17335	326.3	3.05		91500-a	CH-160	5.602	0.09	0.07519	0.00111	0.25231	1059	16.87		R33-a	CH-160	15.138	0.23	0.05606	0.00067	0.058858	412.3	6.16		SL1-2	CH-160	11.317	0.13	0.05971	0.00067	0.1117	545.8	6.14
Plesovice-b	CH-160	19.198	0.15	0.05409	0.00065	0.033694	327.4	2.5		91500-c	CH-160	5.731	0.19	0.0753	0.00204	0.037642	1037	33.68		R33-b	CH-160	15.456	0.32	0.05614	0.00065	0.2302	404.2	8.37		SL1-b	CH-160	11.056	0.1	0.05991	0.00065	-0.033218	558.2	5.2
Plesovice-c	CH-160	18.73	0.19	0.05403	0.00063	0.043844	335.3	3.39		91500-d	CH-160	5.552	0.06	0.07479	0.00093	0.040916	1067	12.46
Plesovice-d	CH-160	18.376	0.19	0.05404	0.0006	0.05589	341.6	3.52		91500-e	CH-160	5.602	0.05	0.07401	0.00103	0.13663	1058.8	10.35
Plesovice-e	CH-160	18.474	0.17	0.05349	0.0006	0.070589	339.8	3.19		91500-f	CH-160	5.596	0.07	0.07517	0.00105	0.2341	1060	12.45
Plesovice-f	CH-160	18.629	0.2	0.05349	0.00059	-0.034416	337.1	3.62		91500-g	CH-160	5.531	0.06	0.07502	0.00094	-0.022882	1071	12.46
Plesovice-g	CH-160	18.553	0.21	0.05306	0.00062	-0.082826	338.4	3.85		91500-i	CH-160	5.627	0.06	0.07481	0.001	0.11305	1054.4	11.91
Plesovice-h	CH-160	18.907	0.15	0.05318	0.00061	0.11624	332.2	2.61		91500-j	CH-160	5.54	0.06	0.07498	0.00101	0.1495	1069.6	11.41
Plesovice-i	CH-160	18.904	0.17	0.05354	0.00061	0.12378	332.3	3.01		91500-k	CH-160	5.612	0.05	0.07467	0.00102	0.27735	1058.2	10.36
Overall average		18.6413	0.191178	0.0550313	0.00137233	0.0462806	336.89	3.37306				5.58667	0.062226	0.0749213	0.00195849	0.0503993	1061.84	11.5077				15.0022	0.172	0.055574	0.000750667	-0.0225684	416.109	4.76667				11.1616	0.208	0.06031	0.0006845	-0.05011	553.328	10.326
St Dev		0.168738	0.0559298	0.005835	0.00196397	0.112228	2.95833					0.0345485	0.017415	0.00151497	0.00262745	0.115182	5.69506					0.29474	0.0600238	0.000450964	0.000178384	0.278257	8.02023	1.6191				0.0994369	0.0608363	0.000581857	0.000160508	0.103558	4.86125	2.9712
																	-0.00297208										-0.00694689										-0.0337449
WMA							337.18										1061.75	1.6									414.65										554.44
Uncertainty							0.41										1.71										2.43										1.95
MSWD							1.81										0.44										4.45										0.63
n							97/116										113/113										13/15										18/20
							-0.000534125										0.00305164										0.0103819										0.0306993
Accepted age							337										1065										419										572
Uncertainty
Concordia age							337.18	337.82									1061.72										415.24										559.91
Unc							0.41	0.55									1.55										1.95										7.73
MSWD							1.81	0.78																													490
n/n							97/116	109/116									1.3										13/15										18/20
http://www.plasmage.org/reference-materials/
Age Reference		Slama, J., Kosler, J., Condon, D.J., Crowley, J.L., Gerdes, A., Hanchar, J.M., Horstwood, M.S.A., Morris, G.A., Nasdala, L., Norberg, N., Schaltegger, U., Schoene, N., Tubrett, M.N., Whitehouse, M.J., 2008. Plesovice zircon - a new natural reference material for U-Pb and Hf isotopic microanalysis. Chemical Geology, 249, 1-2, 1-35.										Wiedenbeck, M., Alle, P., Corfu, F., Griffin, W.L., Meier, M., Oberli, F., von Quadt, A., Roddick, J.C., Spiegel, W., 1995. Three natural zircon standards for U–Th–Pb, Lu–Hf, trace element and REE analyses. Geostandards Newsletter 19, 1-23.										Black, L.P., Kamo, S.L., Allen, C.M., Davis, D.W., Aleinikoff, J.N., Valley, J.W., Mundil, R., Campbell, I.H., Korsch, R.J., Williams, I.S., Foudoulis, C., 2004. Improved Pb-206/U-218 microprobe geochronology by the monitoring of a trace-element-related matrix effect; SHRIMP, ID-TIMS, ELA-ICP-MS and oxygen isotope documentation for a series of zircon standards. Chemical Geology 205, 115-140.							.			Kinny, P.D., Compston, W., Williams, I.S., 1991. A reconnaissance ion-probe study of hafnium isotopes in zircons. Geochimica et Cosmochimica Acta 55, 849-859.							.

## Sheet: Notes
Notes
All data and age calculations were made with Iolite
